# Supplementary material
Source: PubMed Central journal article supplement (PMC4213158)
Supplement: supp_tpc.114.129122_tpc129122_Supplemental.pdf [file supp_tpc.114.129122_tpc129122_Supplemental.pdf]

## Supplemental Figure 1

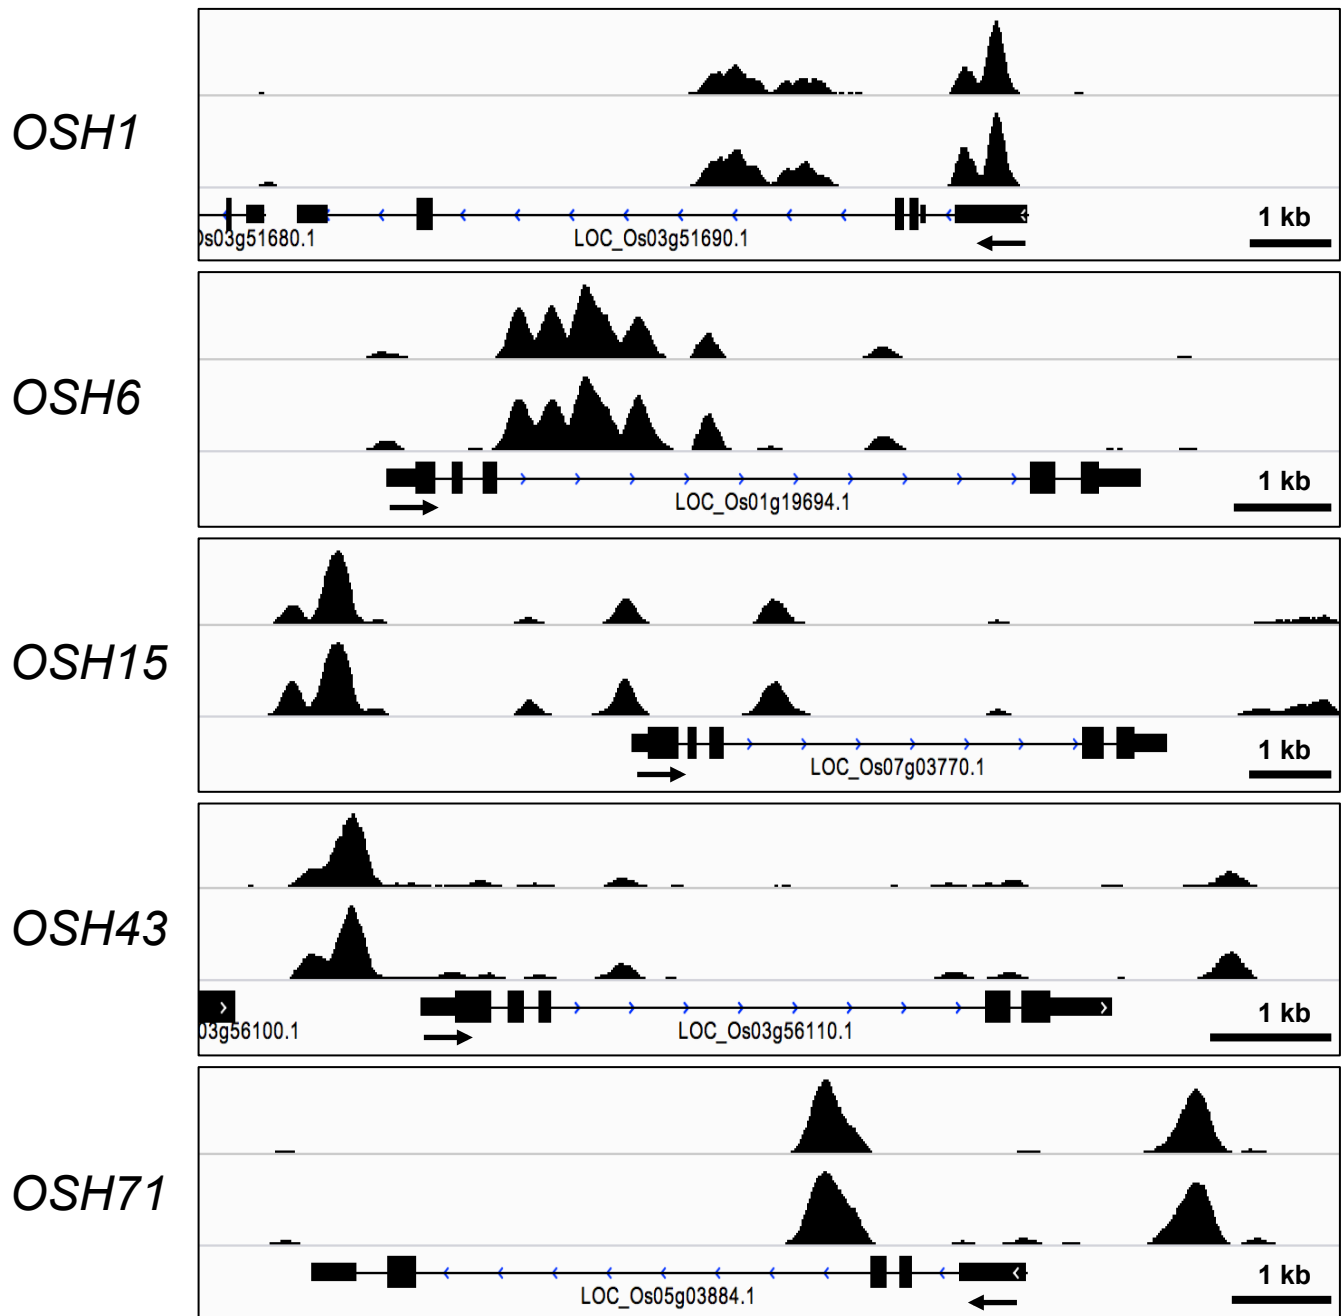**Supplemental Figure 1. OSH1 ChIP-seq data on class I *KNOX* loci.**

OSH1 ChIP-seq data from two biological replicates are shown with gene structures indicated below.

## Supplemental Figure 2

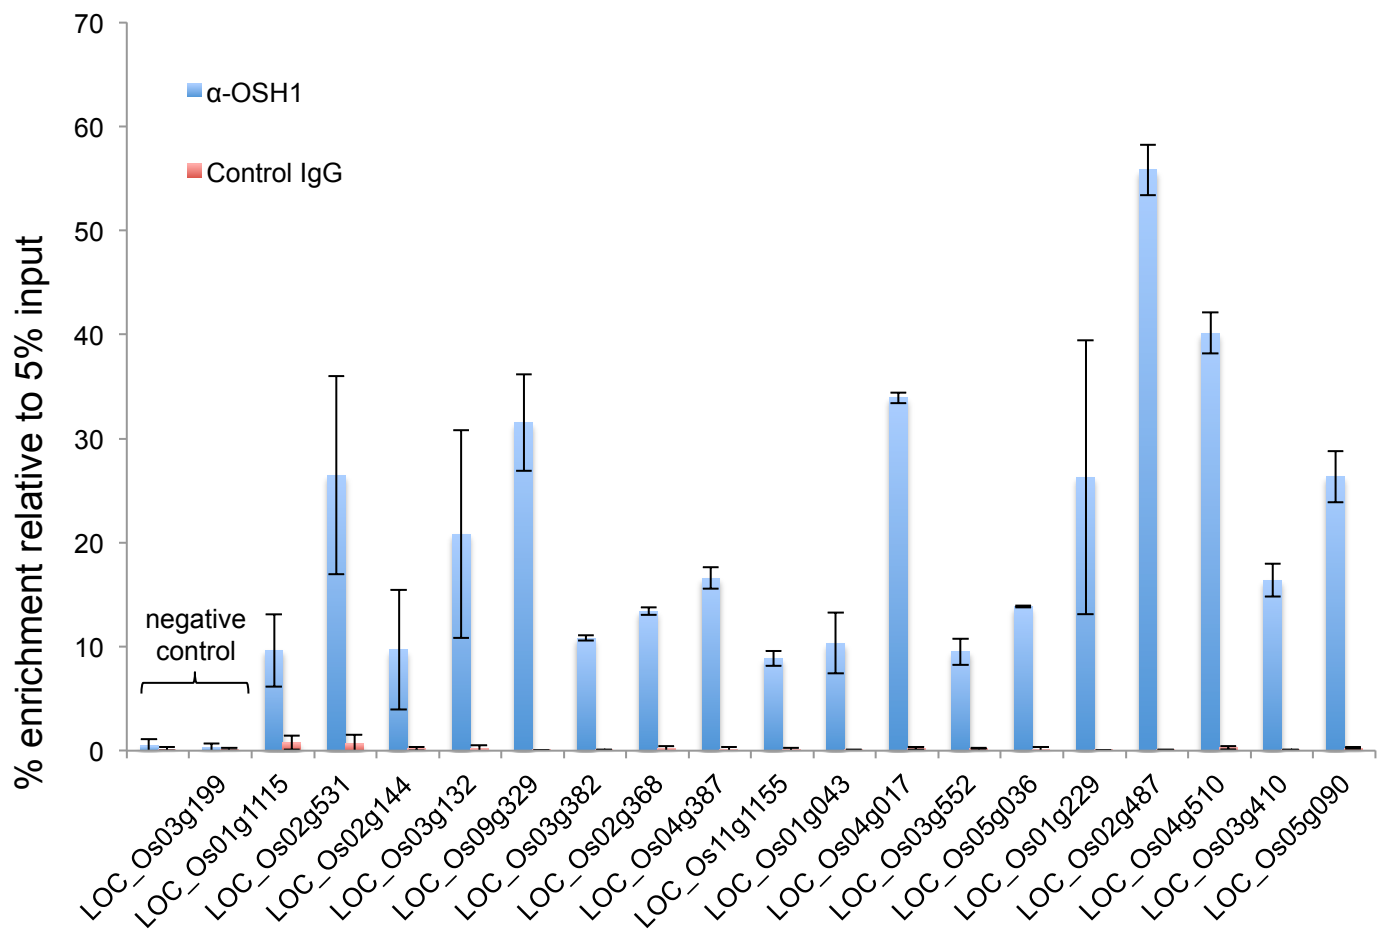**Supplemental Figure 2. Verification of OSH1-bound loci found in ChIP-seq.**

Enrichment of 18 OSH1 bound and 2 unbound loci was examined by ChIP using  $\alpha$ -OSH1 antibody and control IgG followed by qPCR. The percentage of enrichment represents the amount of immunoprecipitated DNA relative to 5% of input DNA. Each data is the average of three biological replicates. Error bars represent the SD. Primers used in this experiment are listed in Supplemental Table 1.

## Supplemental Figure 3

A

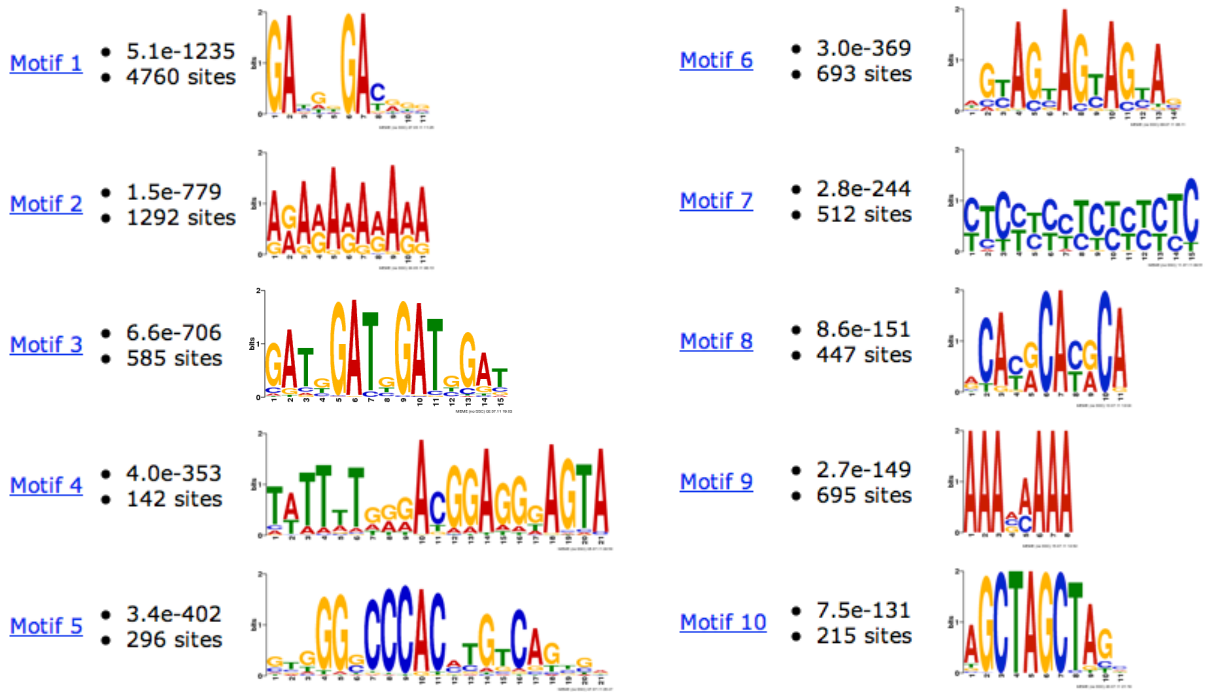

B

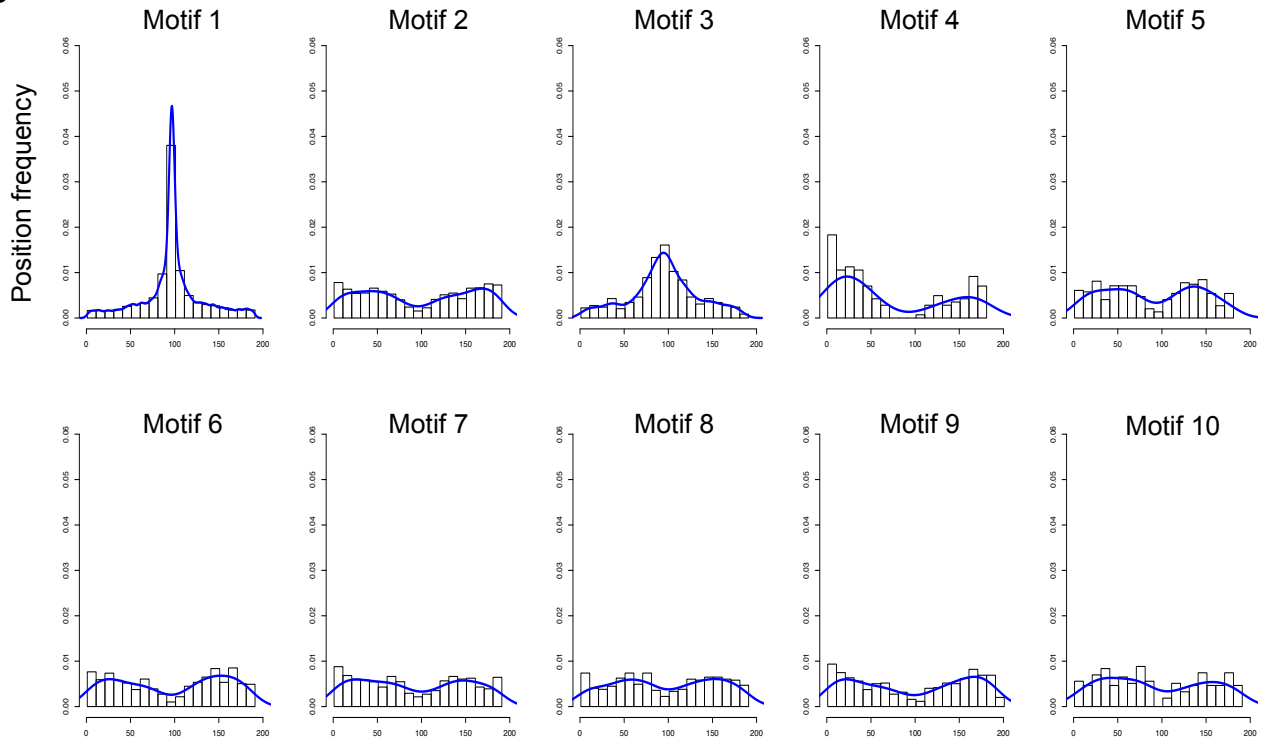**Supplemental Figure 3. Motif enrichment analysis among OSH1 bound regions.**

(A) Ten highly enriched DNA motifs. *p*-values and number of the motifs found in 5,547 OSH1 binding regions are shown left to the DNA motif logos.

(B) Distribution of the motifs in 200 bp region of peaks. The peak summits were positioned in the center. Vertical axis shows the position frequency of OSH1 bound peak summits.

## Supplemental Figure 4

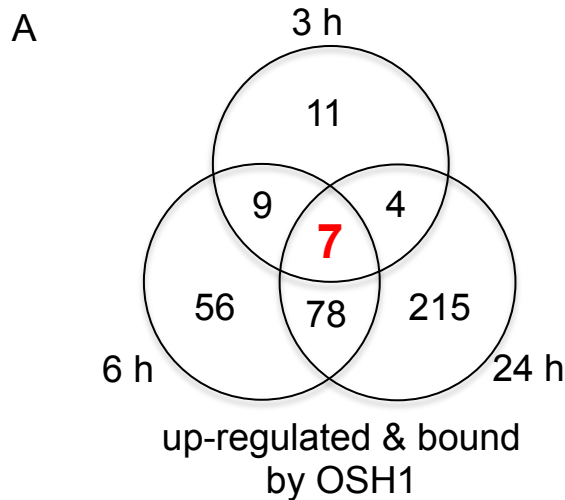

B

| Gene ID        | annotation                        |
|----------------|-----------------------------------|
| LOC_Os01g65920 | 'F-BOX protein'                   |
| LOC_Os01g66120 | 'NAC domain transcription factor' |
| LOC_Os05g11210 | 'not assigned.unknown'            |
| LOC_Os05g29810 | 'AP2/EREBP transcription factor'  |
| LOC_Os06g39880 | 'misc.cytochrome P450' (CYP734A4) |
| LOC_Os06g46030 | 'not assigned.unknown'            |
| LOC_Os08g30520 | 'not assigned.unknown'            |

**Supplemental Figure 4. Seven OSH1 bound genes up-regulated in all time points after DEX induction in 35S:OSH1-GR.**

(A) Venn diagram of OSH1 bound genes up-regulated in 35S:OSH1-GR. The number of OSH1 direct target genes that were up-regulated at all time points after OSH1 induction is shown in red.

(B) List of seven genes up-regulated in all time points after DEX induction.

## Supplemental Figure 5

OSH1 binding peak in *CYP734A2* 3'UTR

tggcgccccacccaggttgccaagaataccctccttaaca **gaccg** **gatcaga**  
 ccagcctttttaa **gattg** **atgac**acacagcaacgtggggcccactc

OSH1 binding peak in *CYP734A4* 3'UTR

cagactagtggtagc **gatcaga**gcacaacttttagg **gattg** **atggtcagaaa**  
 ctctcaga **gagaga** **gaagaga**gacagtagggtagtagcagtagc

OSH1 binding peak in *CYP734A6* promoter

tcagccggcgccatgggcgcat **gacacga**cacgg **tcgactcga**tggtcgat  
**gacatga**gcccat **gacac**gctcgat **gagctgatctgatctgatc**gtgaga

**Supplemental Figure 5. OSH1 binding motifs found in ChIP-seq peaks at three *CYP734A* loci.**

Sequences 50 bp upstream and downstream from the center of OSH1 binding peaks are represented for three *CYP734A* loci. Motif 1 (GANNNGA) shown in Figure 4C is indicated in red color with brackets.

TGAC/GTCA motif previously identified as KNOX binding site by in vitro binding assays (Smith et al. 2002) is shown in blue.

## Supplemental Figure 6

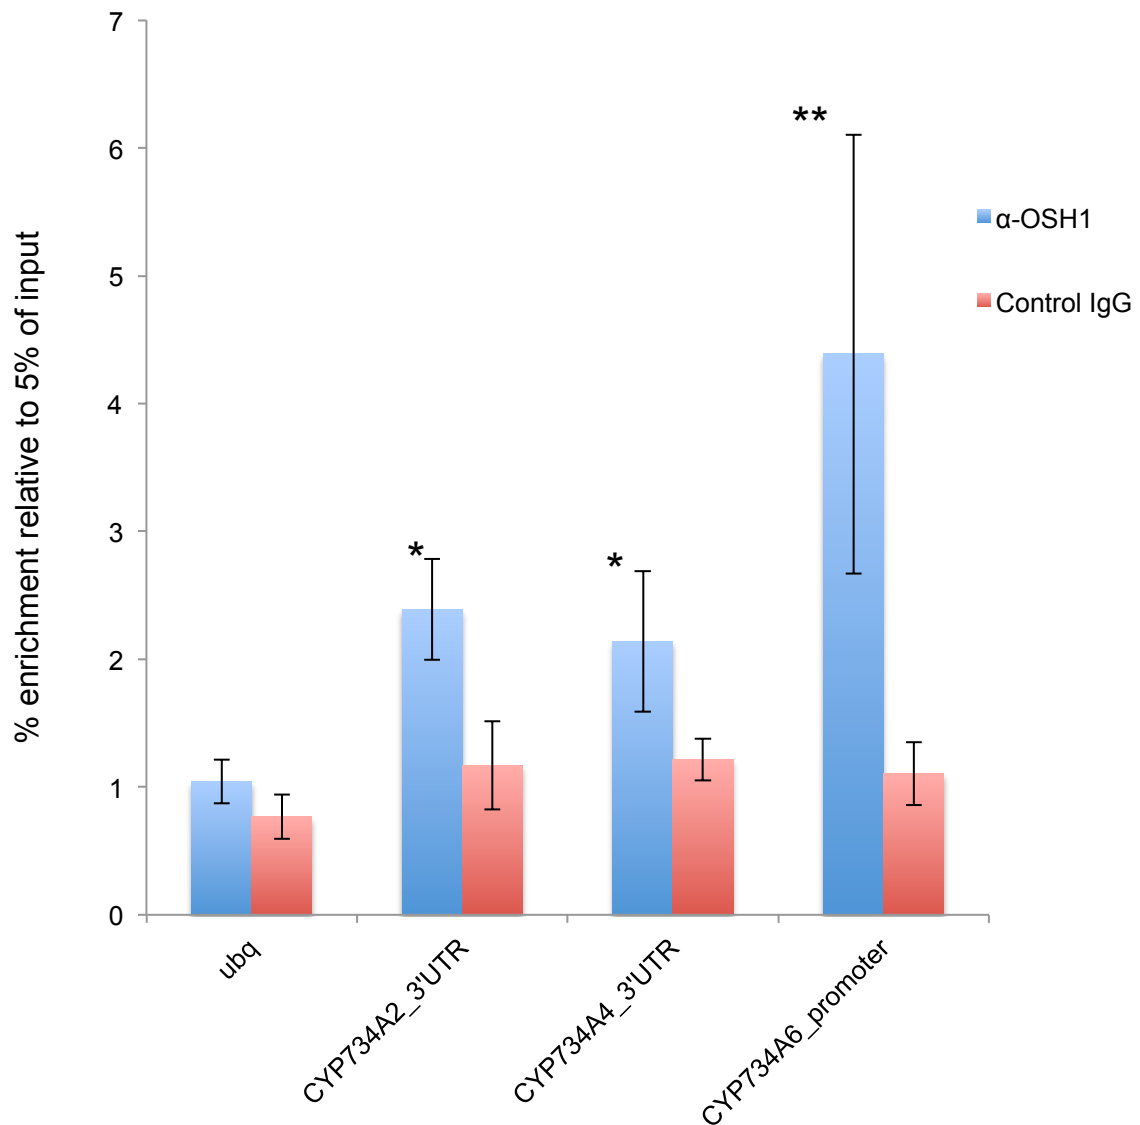

**Supplemental Figure 6. ChIP assay using  $\alpha$ -OSH1 antibody followed by qPCR on three *CYP734A* loci in 2-week-old shoot apices.**

The percentage of enrichment represents the amount of immunoprecipitated DNA relative to 5% of input DNA. Each data point is the average of three biological replicates. Error bars represent the SD. Primers used in this experiment are listed in Supplemental Table 1. Asterisks indicate significant enrichment at  $p < 0.05$  (\*) and at  $p < 0.01$  (\*\*) compared to the control ubiquitin locus in Student's *t*-test.



**Supplemental Figure 7. Expression of BR pathway genes bound by OSH1.**

ChIP-seq data and RNA-seq data are shown in left and middle column. Validation of RNA-seq data by qRT-PCR is shown in right column. For expression data, vertical axis represent the relative expression level. Expression level at each time point is relative to that of before DEX treatment (0 h). For qRT-PCR, the data represent the average of three biological replicates. Error bars represent SD. Primers used in this experiment are listed in Supplemental Table 1.



## Supplemental Figure 8

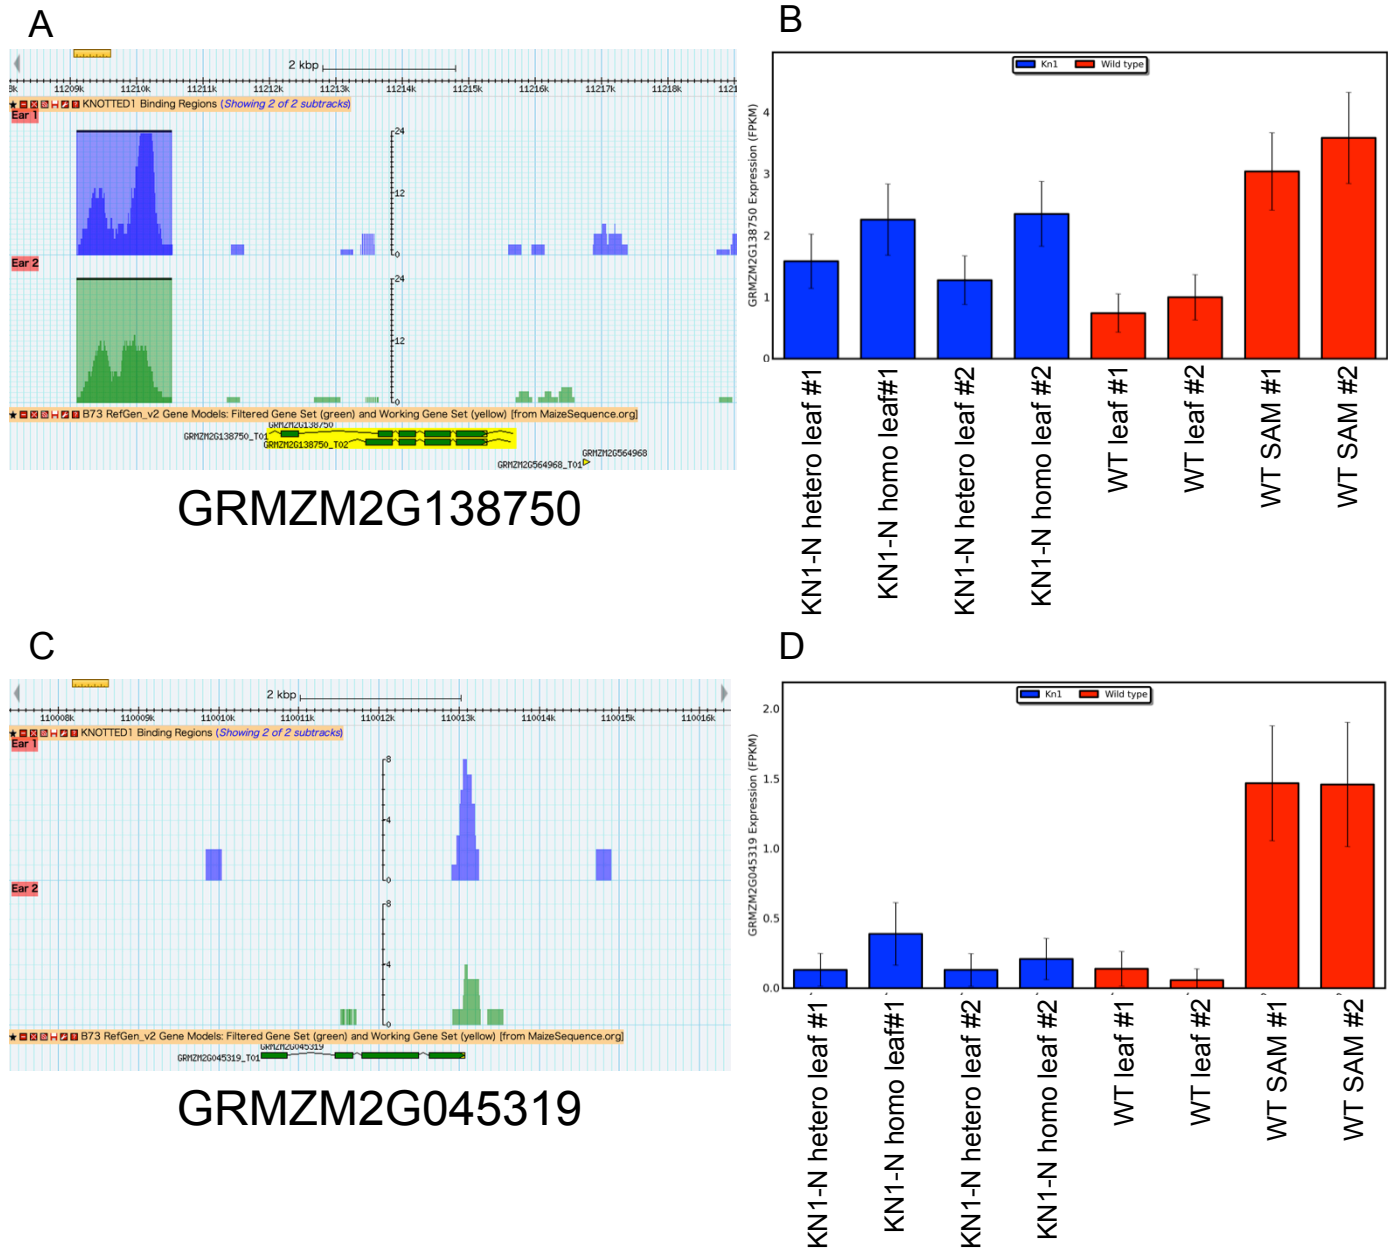**Supplemental Figure 8. KN1 targets *CYP734A* genes in maize.**

(A and C) Snapshots of KN1 ChIP-seq data tracks of MaizeGDB genome browser (<http://www.maizegdb.org/>) on GRMZM2G138750 and GRMZM2G045319 are shown in (A) and in (C), respectively. Two sets of KN1 ChIP-seq data from B73 ears are indicated in the top and middle rows, and the gene structures are shown in the bottom.

(B and D) Relative expression levels of GRMZM2G138750 and GRMZM2G045319 are shown in (B) and in (D), respectively. The data were collected from maize gene expression database qTeller (<http://qteller.com/>). The data represent the average of two or three biological replicates. Error bars represent SD.

Supplemental Data. Tsuda et al. (2014). Plant Cell 10.1105/tpc.114.129122

Supplemental Table 1. Oligo nucleotide sequences used in this study

| Experiment              | Forward Primer       | Sequence                              | Reverse Primer      | Sequence                             | Target                             |
|-------------------------|----------------------|---------------------------------------|---------------------|--------------------------------------|------------------------------------|
| ChIP-seq validation     | KT9                  | AACCAGCTGAGGCCCAAGA                   | KT10                | ACGATTGATTTAACCAGTCCATGA             | ubq                                |
|                         | KT7                  | CGTACAACTTTGCAGAGCCA                  | KT8                 | TCGGAATCTCCACAAGAACC                 | LOC_Os03g19900                     |
|                         | KT1                  | TGGTCACTTCTGCTGTTTCG                  | KT2                 | CAAGTAACCGTGCCTTGATG                 | LOC_Os01g11150                     |
|                         | KT13                 | GCCCCACATGATGGAGAAA                   | KT14                | TTTTTGTCTGTTGCTGGACTG                | LOC_Os03g19900                     |
|                         | KT17                 | ATGCCAGAAACATATCGGA                   | KT18                | GAAGGCGAGAGAGACGTTTG                 | LOC_Os02g14430                     |
|                         | KT21                 | CAATGCGACGTCAACTTCAT                  | KT22                | ATGTCTGCTCCAGTCCAGT                  | LOC_Os03g13200                     |
|                         | KT33                 | TTGGTCTCCTCAGCTCTCGT                  | KT34                | TTTGTGGCATAAAAATACTCCAC              | LOC_Os09g32948                     |
|                         | KT37                 | CTGATGTACAGAGGCTTCAGAGG               | KT38                | TCATGGAACAAGATCAAAGGC                | LOC_Os03g38210                     |
|                         | KT41                 | GGTAGCCAAAGGAAAGGGAC                  | KT42                | TAGCACGTACCGCCTCTTCT                 | LOC_Os02g36880                     |
|                         | KT45                 | GCAGGCTCCAGAGATTTTCA                  | KT46                | ATGGATCCTACACGGGATGA                 | LOC_Os04g38720                     |
|                         | KT49                 | TCCTAGATGTCTTGTCGGG                   | KT50                | CTGTGTGGGCCACCATACTA                 | LOC_Os11g11550                     |
|                         | KT53                 | AATTGTCAATCGCAAATGGCT                 | KT54                | CCTCATTGCACGAAAATGTG                 | LOC_Os01g04350                     |
|                         | KT57                 | TGCATTTTCACTGTCTCACTCC                | KT58                | GGAGTTGAATTGGCAGAAA                  | LOC_Os04g01740                     |
|                         | KT61                 | TGATCCATCCGATGCAGATA                  | KT62                | AGTGCTACAGTGTTCGCTGC                 | LOC_Os03g55250                     |
|                         | KT65                 | GCAAATGCAATTCAGAGCAA                  | KT66                | CTCCATGAAGGAAGAGCAGC                 | LOC_Os05g03640                     |
|                         | KT69                 | TTCGGACTTTCAAGCAGAA                   | KT70                | TTCTGTGTGGTATGGTGACA                 | LOC_Os01g22900                     |
|                         | KT73                 | TAGGACGATATGCCAGGAGG                  | KT74                | TGAGCACACGAGTCACTCA                  | LOC_Os02g48770                     |
|                         | KT77                 | AGGACACTTGAGACGTGCG                   | KT78                | GCCGGTACATAAAAAGTAGGCA               | LOC_Os04g51000                     |
|                         | KT85                 | GGTACCACGAGCTGAAGAGC                  | KT86                | GTCCGTCCCGGTGGTAG                    | LOC_Os03g41060                     |
| KT89                    | ATCAAGTGCAGCTCAGGGAT | KT90                                  | GAGATGCCTCACCTGTCAA | LOC_Os05g09020                       |                                    |
| ChIP qPCR in shoot apex | KT583                | ccaccaggttgccaagaat                   | KT584               | ggcaacaaaagaagggcgag                 | LOC_Os02g11020 (CYP734A2) 3'UTR    |
|                         | KT461                | gtacgatcagagcacaacttttagg             | KT462               | ggggctactgctactacctactac             | LOC_Os06g39880 (CYP734A4) 3'UTR    |
|                         | KT671                | actcgcaaggatctctctca                  | KT672               | atcgacgtgcatgggctc                   | LOC_Os01g29150 (CYP734A6) promoter |
| qRT-PCR                 | KT408                | ATGTGCGTAGGCCAGAACCT                  | KT409               | GGTATAGGAGCATCAGCACTGTC              | LOC_Os02g11020 (CYP734A2)          |
|                         | KT410                | GACAGCGGCTTCAACGACTT                  | KT411               | AGGTTGGTGGTCTGCTGCTT                 | LOC_Os06g39880 (CYP734A4)          |
|                         | KT412                | GTTTACACCGTTCCGGCTTG                  | KT413               | GACGTATCTGGCCGACAACC                 | LOC_Os01g29150 (CYP734A6)          |
|                         | KT394                | GGAGGAAGAAGGTAACAACAATA               | KT395               | tcctatctaactcgcaaaatgttc             | LOC_Os03g40540 (OsBR6ox)           |
|                         | KT392                | CACATCGTCAACTTCCCAC                   | KT393               | tctactagttagatggtgacg                | LOC_Os01g10040 (D2/CYP90D2)        |
|                         | KT396                | AGAATGAGGAGAGGCTGTTTCAGT              | KT397               | AGTGCTAGAGCAAGGTTCTGAG               | LOC_Os04g39430 (D11)               |
|                         | KT388                | CAAGGGTATGTTTATAGCTATGGT              | KT389               | GTTATTGTCTCGCCAAAGTCT                | LOC_Os01g52050 (BRI1)              |
| 35S:OSH1-GR             | KT694                | ccctctagaATGGAGGAGATCTCCACCAC         | KT695               | GAA'TcccgggGCCGAGCCTGTAGAGGCCGCCGT   | OSH1 coding region                 |
|                         | KT696                | CGGCcccgggATTGAGCAAGCCACTGCAGGAG      | KT697               | aaaggtacctcaTTTTGATGAAACAGAAGC       | GR domain                          |
| CYP734A6 reporter       | KT604                | ccctctagagtagtgagcaaatgctaggatg       | KT607               | CTTGCTCACCATcacctccaggaagccgagaac    | CYP734A6 promoter                  |
|                         | KT608                | ccgtggaggtagGGTGTAGCAAGGGCGAGGAGCTGTT | KT609               | cactgacacggCTACTTGTACAGCTCGTCCATGCCG | GFP                                |
|                         | KT610                | AGCTGTACAAGTAGccgtgtcagtgatgaggtgctg  | KT611               | cccggtaaccttggcgtgaactaaacacaacctatc | CYP734A6 3' region                 |
| CYP734A2 RNAi           | KT469                | caccATCTACGGGCATAGGTTCTTGAT           | KT470               | GTCGGCCTTCTCGCCTTGCTCGGC             | CYP734A2                           |

**Supplemental Table 2. Summary statistics for ChIP-seq library alignment**

| Antibody       | DRA Accession # | Read Length | Total # of Paired End Reads | Mapped Paired End Reads | % Mapping |
|----------------|-----------------|-------------|-----------------------------|-------------------------|-----------|
| $\alpha$ -OSH1 | DRR000602       | 106         | 22132344                    | 8954827                 | 40.46     |
| control IgG    | DRR000603       | 106         | 23042540                    | 5386883                 | 23.38     |
| $\alpha$ -OSH1 | DRR000743       | 106         | 31055647                    | 16376288                | 52.73     |
| control IgG    | DRR000744       | 106         | 31299193                    | 5178433                 | 16.54     |

**Supplemental Table 3. Summary statistics for RNA-seq library alignment**

| Sample Genotype | DEX treatment (hr) | DRA Accession # | Sample name | Total Reads | Reads aligned | Reads not aligned | Alignment % |
|-----------------|--------------------|-----------------|-------------|-------------|---------------|-------------------|-------------|
| 35S:OSH1-GR     | 0                  | DRA002287       | KTSH001A    | 35884679    | 28545859      | 7338820           | 79.55       |
| 35S:OSH1-GR     | 3                  | DRA002287       | KTSH001B    | 30777093    | 25204304      | 5572789           | 81.89       |
| 35S:OSH1-GR     | 6                  | DRA002287       | KTSH001C    | 30557139    | 25093360      | 5463779           | 82.12       |
| 35S:OSH1-GR     | 24                 | DRA002287       | KTSH001D    | 26420016    | 21712958      | 4707058           | 82.18       |
| WT              | 0                  | DRA002287       | KTSH001E    | 22139758    | 18335746      | 3804012           | 82.82       |
| WT              | 3                  | DRA002287       | KTSH001F    | 26531266    | 21468643      | 5062623           | 80.92       |
| WT              | 6                  | DRA002287       | KTSH001G    | 22912448    | 18853872      | 4058576           | 82.29       |
| WT              | 24                 | DRA002287       | KTSH001H    | 23647083    | 19755083      | 3892000           | 83.54       |
| 35S:OSH1-GR     | 0                  | DRA002287       | KTSH002A    | 21058015    | 17457838      | 3600177           | 82.9        |
| 35S:OSH1-GR     | 3                  | DRA002287       | KTSH002B    | 19362290    | 16050943      | 3311347           | 82.9        |
| 35S:OSH1-GR     | 6                  | DRA002287       | KTSH002C    | 30120078    | 24726402      | 5393676           | 82.09       |
| 35S:OSH1-GR     | 24                 | DRA002287       | KTSH002D    | 21922524    | 17940091      | 3982433           | 81.83       |
| WT              | 0                  | DRA002287       | KTSH002E    | 21522988    | 17873397      | 3649591           | 83.04       |
| WT              | 3                  | DRA002287       | KTSH002F    | 20713953    | 17236425      | 3477528           | 83.21       |
| WT              | 6                  | DRA002287       | KTSH002G    | 21114305    | 17662248      | 3452057           | 83.65       |
| WT              | 24                 | DRA002287       | KTSH002H    | 20859761    | 17424922      | 3434839           | 83.53       |
